# Supplementary material
Source: HighWire-hosted journal article supplement (http://www.cmaj.ca/highwire/filestream/57619/field_highwire_adjunct_files/2/risk-tran-appendix_3.pdf)
Supplement: risk-tran-appendix_3.pdf [file risk-tran-appendix_3.pdf]

**Appendix 3** (as supplied by the authors): Clinical characteristics of children with asthma admitted with seasonal influenza A (2004-2009).

| Age group     | Usual asthma medication                                          | Asthma severity | Other comorbidities                                   | Previous asthma related admission? | Previous intensive care unit admission? | Pneumonia?            | Admitted to intensive care unit? | Mechanical ventilation? | Reason for admission        |
|---------------|------------------------------------------------------------------|-----------------|-------------------------------------------------------|------------------------------------|-----------------------------------------|-----------------------|----------------------------------|-------------------------|-----------------------------|
| <b>2004-5</b> |                                                                  |                 |                                                       |                                    |                                         |                       |                                  |                         |                             |
| >12 years     | Regular fluticasone/salmeterol.; salbutamol as required          | Moderate        | Recent diagnosis of minimal change nephrotic syndrome | Yes                                | No                                      | No (chest X-ray done) | No                               | No                      | Acute bronchospasm          |
| 2-5 years     | Regular fluticasone and salbutamol                               | Moderate        | None                                                  | Yes                                | No                                      | No (chest X-ray done) | Yes                              | No                      | Croup                       |
| 6-12 years    | Salbutamol nightly; regular fluticasone prescribed but not used. | Moderate        | None                                                  | Yes                                | No                                      | Yes                   | No                               | No                      | Acute bronchospasm          |
| 12-23 months  | Regular fluticasone; salbutamol as required                      | Moderate        | None                                                  | Yes                                | No                                      | No (chest X-ray done) | No                               | No                      | Acute bronchospasm          |
| <b>2005-6</b> |                                                                  |                 |                                                       |                                    |                                         |                       |                                  |                         |                             |
| 6-12 years    | Budesonide and salbutamol as required                            | Moderate        | Developmental delay, seizure disorder                 | Yes                                | No                                      | No (chest X-ray done) | No                               | No                      | Increased seizure frequency |

*continued*

| <b>Appendix 3</b> (continued) |                                                                       |                        |                                                                                                                                          |                                           |                                                |                   |                                         |                                |                             |
|-------------------------------|-----------------------------------------------------------------------|------------------------|------------------------------------------------------------------------------------------------------------------------------------------|-------------------------------------------|------------------------------------------------|-------------------|-----------------------------------------|--------------------------------|-----------------------------|
| <b>Age group</b>              | <b>Usual asthma medication</b>                                        | <b>Asthma severity</b> | <b>Other comorbidities</b>                                                                                                               | <b>Previous asthma related admission?</b> | <b>Previous intensive care unit admission?</b> | <b>Pneumonia?</b> | <b>Admitted to intensive care unit?</b> | <b>Mechanical ventilation?</b> | <b>Reason for admission</b> |
| <b>2007-8</b>                 |                                                                       |                        |                                                                                                                                          |                                           |                                                |                   |                                         |                                |                             |
| <12 months                    | ? Intermittent fluticasone with salbutamol as required with infection | Indeterminate          | Eczema, family history of asthma; Pneumothorax complicating respiratory distress at birth (not premature)                                | No                                        | No                                             | Yes               | No                                      | No                             | Bronchospasm and pneumonia  |
| 6-12 years                    | Regular budesonide; salbutamol and ipratropium as required            | Moderate               | Eczema; developmental delay; cerebral palsy; obstructive sleep apnea; recurrent aspiration; gastrostomy tube ventriculoperitoneal shunt. | Yes                                       | No                                             | Yes               | No                                      | No                             | Pneumonia with bronchospasm |

*continued*

| <b>Appendix 3</b> (continued) |                                             |                        |                                                                                                                                     |                                           |                                                |                               |                                         |                                |                                                                               |
|-------------------------------|---------------------------------------------|------------------------|-------------------------------------------------------------------------------------------------------------------------------------|-------------------------------------------|------------------------------------------------|-------------------------------|-----------------------------------------|--------------------------------|-------------------------------------------------------------------------------|
| <b>Age group</b>              | <b>Usual asthma medication</b>              | <b>Asthma severity</b> | <b>Other comorbidities</b>                                                                                                          | <b>Previous asthma related admission?</b> | <b>Previous intensive care unit admission?</b> | <b>Pneumonia?</b>             | <b>Admitted to intensive care unit?</b> | <b>Mechanical ventilation?</b> | <b>Reason for admission</b>                                                   |
| 2-5 years                     | Regular budesonide                          | Moderate               | Developmental delay; cerebral palsy; seizures; ventriculo-peritoneal shunt; gastro-esophageal reflux; gastrostomy tube; splenectomy | No                                        | No                                             | Possible                      | No                                      | No                             | Rule out ventriculo-peritoneal shunt infection, possible aspiration pneumonia |
| <b>2008-9</b>                 |                                             |                        |                                                                                                                                     |                                           |                                                |                               |                                         |                                |                                                                               |
| 6-12 years                    | Regular fluticasone; salbutamol as required | Moderate               | Autism                                                                                                                              | No                                        | No                                             | No (chest X-ray done)         | No                                      | No                             | Acute bronchospasm                                                            |
| 2-5 years                     | Regular fluticasone; salbutamol as required | Moderate               | Global developmental delay; sensorineural hearing loss                                                                              | No                                        | No                                             | Possible aspiration pneumonia | No                                      | No                             | New onset seizures (no asthma symptoms)                                       |
| 12-24 months                  | Regular fluticasone; salbutamol as required | Moderate               | None                                                                                                                                | No                                        | No                                             | No (chest X-ray done)         | Yes                                     | Yes                            | Febrile status epilepticus                                                    |
